# Supplementary material
Source: publisher figshare collection journal article supplement (https://geolsoc.figshare.com/ndownloader/files/25995915)
Supplement: Supplementary file 1 [file 25995915]

## Sheet: U-Th-He Data
	Supplementary File 4. All (U-Th)/He data.
	Sample	mineral	Age (Ma)	Error	U (ppm)	Th (ppm)	147Sm (ppm)	[U]e	Th/U	He (nmol/g)	mass (ug)	Ft	ESR	Notes on Exclusion	Mean Age	Std Dev	Std Err	included	total	Alt SE	Max SE	2 SE
	z161-74-1	zircon	100.638	8.05103	95.1604	28.9165	1.24554	101.823	0.303871	42.4593	4.98913	0.762643	48.857		99.0184	8.17545	3.65617	5	6	2.81255	3.65617	7.31235
	z161-74-2	zircon	86.7708	6.94167	139.317	38.3639	2.20223	148.159	0.275371	50.0375	2.82176	0.717455	40.2619
	z161-74-3	zircon	-592096	-47367.6	0	-0.138386	0	-0.0318565	65535	38.2688	3.04825	0.696155	40.6539	Shattered and lost
	z161-74-4	zircon	95.511	7.64088	78.4056	43.9593	2.77049	88.5389	0.560665	33.0928	3.24107	0.71982	41.3384
	z161-74-5	zircon	104.964	8.39714	43.2677	26.6548	1.15801	49.4094	0.616043	20.9211	4.76955	0.741246	45.2418
	z161-74-6	zircon	107.208	8.57665	48.8874	30.1435	1.23305	55.8326	0.61659	24.5056	5.03968	0.752091	47.4121
	z181-N154-1	zircon	130.8	10.46	1540.8	1992.3	13.8	1999.5	1.29	1097.5	6.14	0.77	52.05	Outlier	99.0667	1.09697	0.633333	3	4	2.816	2.8	5.6
	z181-N154-2	zircon	97.8	7.83	685.6	448.7	9.9	788.9	0.65	294.4	2.86	0.7	38.66
	z181-N154-3	zircon	99.7	7.98	227.5	54.7	-8	240	0.24	88.5	2.36	0.68	35.08
	z181-N154-5	zircon	99.7	7.98	210.5	187.8	3.4	253.7	0.89	111.7	10.9	0.81	63.56
		Reference: Seymour, N.M., Singleton, J.S., Mavor, S.P., Gomila, R., Stockli, D.F., Heuser, G., and Arancibia, G. 2020. The relationship between arc magmatism and deformation along the intra-arc strike-slip Atacama fault system, northern Chile. Tectonics, doi: 10.1029/2019TC005702.
